# Supplementary material for: Ratings of the Effectiveness of Nutraceuticals for Autism Spectrum Disorders: Results of a National Survey
Source: J Pers Med. 2021 Aug 31;11(9):878. doi: 10.3390/jpm11090878 (PMC8470413; doi:10.3390/jpm11090878)
Supplement: Supplementary file 1 [file jpm-11-00878-s001.zip › jpm-1336889-supplementary.pdf]

**Table S1.** List of All Nutraceuticals in Survey

| Nutraceutical Supplements |
|---------------------------|
| 5-HTP                     |
| Alanine                   |
| Aloe or Super Aloe        |
| Alpha Ketoglutaric Acid   |
| Amino Acid Complex        |
| Arginine                  |
| Asparagine                |
| Aspartic Acid             |
| Biotin                    |
| Black Currant Seed Oil    |
| Blend of Amino Acids      |
| Borage Oil                |
| Calcium                   |
| Caprylic acid             |
| Carnitine                 |
| Carnosine                 |
| Chia Seed                 |
| Choline                   |
| Chromium                  |
| Citrus seed extract       |
| Cod Liver oil             |
| Copper                    |
| CoQ10                     |
| Cysteine                  |
| Digestive Enzymes         |
| DMG                       |
| Evening Primrose Oil      |
| Fish Oil (not from liver) |
| Flax Seed Oil             |
| Flax Seeds                |

|                                                              |
|--------------------------------------------------------------|
| Folic Acid                                                   |
| Folinic Acid                                                 |
| Folinic Acid, High dose (over 5 mg/day)                      |
| Folinic Acid, Moderate dose (under 5 mg/day)                 |
| Fruit/ Vegetable Powder Concentrate                          |
| GABA                                                         |
| Generic child/adult multivitamin                             |
| Ginkgo Bilboa                                                |
| Glutamic Acid                                                |
| Glutamine                                                    |
| Glutathione                                                  |
| Glutathione -- IV                                            |
| Glutathione -- Oral                                          |
| Glutathione -- Transdermal                                   |
| Glycine                                                      |
| Herbal                                                       |
| High-dose multivitamin                                       |
| High-dose multivitamin designed for children/adults with ASD |
| Histidine                                                    |
| Inositol                                                     |
| Iodine                                                       |
| Iron                                                         |
| Isoleucine                                                   |
| Krill Oil                                                    |
| Lactulose                                                    |
| Lamisil                                                      |
| Leucine                                                      |
| Lithium (as nutritional supplement)                          |
| Magnesium                                                    |
| Magnesium Citrate                                            |
| Manganese                                                    |
| Melatonin                                                    |
| Methionine                                                   |

|                                             |
|---------------------------------------------|
| Methylcobalamin (Methyl B12)                |
| Methylcobalamin Injections                  |
| Milk Thistle (Silymarin) for Liver Function |
| Mineral oil                                 |
| Miralax                                     |
| Molybdenum                                  |
| NAC (N-acetylcysteine) -- Oral              |
| NAC (N-acetylcysteine) -- Transdermal       |
| Olive Leaf Extract                          |
| Omega-3                                     |
| Omega-6                                     |
| Oregano concentrate                         |
| P5P                                         |
| Pau d'arco                                  |
| Phenylalanine                               |
| Phosphorus                                  |
| Piracetam                                   |
| Potassium                                   |
| Pregnenolone                                |
| Probiotics                                  |
| Proline                                     |
| Pycnogenol                                  |
| Ribose                                      |
| Saccharomyces boulardii                     |
| Saline Enemas                               |
| SAMe                                        |
| Selenium                                    |
| Slippery Elm                                |
| Sporanox                                    |
| St. John's Wort                             |
| Sulforaphane                                |
| Sulfur as Chondroitin Sulfate               |
| Sulfur as Epsom Salts in a bath             |

|                                                           |
|-----------------------------------------------------------|
| Sulfur as Epsom Salts in a lotion                         |
| Sulfur as Glucosamine Sulfate                             |
| Sulfur as MSM                                             |
| Taurine                                                   |
| Threonine                                                 |
| TMG                                                       |
| Tryptophan                                                |
| Tyrosine                                                  |
| Undecylenic acid                                          |
| Valerian Root                                             |
| Valine                                                    |
| Vitamin A (as cod liver oil)                              |
| Vitamin A (not as cod liver oil)                          |
| Vitamin B1 (thiamin)                                      |
| Vitamin B12 (cobalamin) -- Injection                      |
| Vitamin B12 (cobalamin) -- Oral                           |
| Vitamin B2 (riboflavin)                                   |
| Vitamin B3 (as NADH)                                      |
| Vitamin B3 (niacin/niacinamide)                           |
| Vitamin B5 ( pantethine/pantothenic acid)                 |
| Vitamin B6 (pyridoxine), High dose (over 100 mg/day)      |
| Vitamin B6 (pyridoxine), Moderate dose (under 100 mg/day) |
| Vitamin C                                                 |
| Vitamin D                                                 |
| Vitamin E                                                 |
| Vitamin K                                                 |
| Zinc                                                      |

**Table S2.** Amino Acids. The table lists the Overall Benefit Score, the most common benefits, the Overall Adverse Score, and the most common adverse effects.

| Amino Acids |
|-------------|
|-------------|

|                                            | Treatments (n)  |                           |              |                |
|--------------------------------------------|-----------------|---------------------------|--------------|----------------|
|                                            | Tryptophan (22) | Blend of Amino Acids (52) | Taurine (28) | Glutamine (21) |
| <b>Overall Benefit Score</b>               | 1.6             | 1.5                       | 1.5          | 1.1            |
|                                            |                 |                           |              |                |
| <b>Symptoms-Benefit</b>                    |                 |                           |              |                |
| General benefit, no one particular symptom |                 | 54%                       | 43%          | 57%            |
| Aggression/Agitation                       |                 |                           | 7%           |                |
| Anxiety                                    | 18%             | 12%                       | 14%          |                |
| Attention                                  |                 | 13%                       |              | 10%            |
| Diarrhea                                   |                 |                           |              | 10%            |
| Falling Asleep                             | 32%             |                           |              |                |
| Staying Asleep                             | 23%             |                           |              |                |
|                                            |                 |                           |              |                |
| <b>Overall Adverse Score</b>               | 0.2             | 0.1                       | 0.4          | 0.1            |
|                                            |                 |                           |              |                |
| <b>Symptoms-Adverse</b>                    |                 |                           |              |                |
| General worsening, no one specific symptom | 5%              | 4%                        |              |                |
| Anxiety                                    | 9%              |                           | 7%           |                |
| Aggression/Agitation                       | 5%              |                           | 7%           | 5%             |
| Bedwetting/Bladder control problem         |                 | 2%                        |              |                |
| Behavioral Problems                        |                 |                           |              | 5%             |
| Hyperactivity                              |                 | 2%                        |              | 10%            |

|              |  |  |    |  |
|--------------|--|--|----|--|
| Irritability |  |  | 7% |  |
|--------------|--|--|----|--|

**Table S3. Fatty Acids.** The table lists the Overall Benefit Score, the most common benefits, the Overall Adverse Score, and the most common adverse effects.

|                                            | <b>Fatty Acids</b>    |                      |                                  |                       |                           |                        |                           |
|--------------------------------------------|-----------------------|----------------------|----------------------------------|-----------------------|---------------------------|------------------------|---------------------------|
|                                            | <b>Treatments (n)</b> |                      |                                  |                       |                           |                        |                           |
|                                            | <b>Omega 6 (68)</b>   | <b>Omega 3 (188)</b> | <b>Evening Primrose Oil (20)</b> | <b>Fish Oil (161)</b> | <b>Cod Liver Oil (59)</b> | <b>Krill Oil (164)</b> | <b>Flax Seed Oil (58)</b> |
| <b>Overall Benefit Score</b>               | 2                     | 1.8                  | 1.6                              | 1.6                   | 1.5                       | 1.5                    | 1.2                       |
| <b>Symptoms-Benefit</b>                    |                       |                      |                                  |                       |                           |                        |                           |
| General Benefit, no one particular symptom | 59%                   | 43%                  | 45%                              | 32%                   | 40%                       | 53%                    | 47%                       |
| Attention                                  | 25%                   | 17%                  | 20%                              | 14%                   | 22%                       |                        | 3%                        |
| Cognition                                  | 26%                   | 25%                  | 10%                              | 25%                   | 32%                       | 17%                    |                           |
| Constipation                               |                       |                      |                                  |                       |                           |                        | 16%                       |
| Language/Communication                     |                       |                      |                                  |                       |                           | 10%                    |                           |
| <b>Overall Adverse Score</b>               | 0                     | 0                    | 0.2                              | 0                     | 0.1                       | 0.2                    | 0.1                       |
| <b>Symptoms-Adverse</b>                    |                       |                      |                                  |                       |                           |                        |                           |
| General worsening, no one specific symptom |                       | 1%                   |                                  |                       |                           |                        |                           |
| Aggression/Agitation                       |                       | 1%                   | 10%                              |                       | 1%                        | 3%                     |                           |
| Anxiety                                    |                       | 1%                   | 5%                               |                       |                           |                        |                           |
| Gastrointestinal problems                  |                       |                      |                                  | 1%                    | 1%                        | 3%                     | 3%                        |
| Hyperactivity                              |                       |                      | 5%                               |                       | 2%                        |                        |                           |

|                                               |  |  |  |    |  |    |  |
|-----------------------------------------------|--|--|--|----|--|----|--|
| Rash                                          |  |  |  |    |  | 2% |  |
| Seizures                                      |  |  |  |    |  | 3% |  |
| Stimming/Perseveration/Desire for<br>Sameness |  |  |  | 1% |  |    |  |

**Table S4.** Glutathione-related Nutraceuticals. The table lists the Overall Benefit Score, the most common benefits, the Overall Adverse Score, and the most common adverse effects.

|                                            | Glutathione-related Nutraceuticals |                       |               |                              |
|--------------------------------------------|------------------------------------|-----------------------|---------------|------------------------------|
|                                            | Treatments (n)                     |                       |               |                              |
|                                            | Glutathione, any type (62)         | Oral Glutathione (42) | Oral NAC (49) | Transdermal Glutathione (27) |
| <b>Overall Benefit Score</b>               | 1.7                                | 1.5                   | 1.4           | 1.1                          |
|                                            |                                    |                       |               |                              |
| <b>Symptoms-Benefit</b>                    |                                    |                       |               |                              |
| General Benefit, no one particular symptom | 56%                                | 43%                   | 4%            | 41%                          |
| Attention                                  |                                    |                       | 4%            | 4%                           |
| Cognition                                  |                                    | 12%                   | 4%            | 4%                           |
| Constipation                               |                                    |                       |               |                              |
| Language/Communication                     | 19%                                |                       |               |                              |
| Social Interaction and Understanding       | 16%                                | 7%                    |               |                              |
|                                            |                                    |                       |               |                              |
| <b>Overall Adverse Score</b>               | 0.06                               | 0                     | 0.3           | 0.2                          |
|                                            |                                    |                       |               |                              |
| <b>Symptoms-Adverse</b>                    |                                    |                       |               |                              |
| General worsening, no one specific symptom | 3%                                 |                       |               | 4%                           |
| Aggression/Agitation                       |                                    |                       | 4%            |                              |
| Anxiety                                    |                                    |                       | 4%            |                              |
| Behavioral problems                        |                                    |                       | 4%            |                              |
| Hyperactivity                              |                                    |                       |               |                              |
| Irritability                               | 3%                                 | 2%                    |               |                              |

|                                            |    |  |  |    |
|--------------------------------------------|----|--|--|----|
| Rash                                       |    |  |  | 4% |
| Stimming/Perseveration/Desire for Sameness | 2% |  |  |    |

**Table S5.** Individual Minerals. The table lists the Overall Benefit Score, the most common benefits, the Overall Adverse Score, and the most common adverse effects.

|                                            | Individual Minerals |              |                    |                  |                  |               |                 |                |                  |
|--------------------------------------------|---------------------|--------------|--------------------|------------------|------------------|---------------|-----------------|----------------|------------------|
|                                            | Treatments (n)      |              |                    |                  |                  |               |                 |                |                  |
|                                            | Potassium<br>(26)   | Iron<br>(76) | Magnesium<br>(153) | Chromium<br>(19) | Calcium<br>(110) | Zinc<br>(124) | Lithium<br>(21) | Iodine<br>(20) | Selenium<br>(39) |
| <b>Overall Benefit Score</b>               | 2.1                 | 1.9          | 1.9                | 1.8              | 1.7              | 1.7           | 1.6             | 1.5            | 1.3              |
|                                            |                     |              |                    |                  |                  |               |                 |                |                  |
| <b>Symptoms-Benefit</b>                    |                     |              |                    |                  |                  |               |                 |                |                  |
| General Benefit, no one particular symptom | 62%                 | 43%          | 37%                | 53%              | 50%              | 47%           | 38%             | 70%            | 56%              |
| Aggression/Agitation                       |                     |              |                    |                  |                  |               | 14%             |                |                  |
| Anxiety                                    |                     |              | 18%                |                  | 5%               |               | 24%             | 5%             |                  |
| Cognition                                  |                     |              |                    | 11%              |                  |               |                 | 5%             |                  |
| Constipation                               |                     |              | 27%                |                  |                  |               |                 |                | 3%               |
| Falling Asleep                             |                     |              |                    |                  | 4%               |               |                 |                |                  |
| Health                                     | 15%                 | 7%           |                    |                  |                  | 19%           |                 |                |                  |
| Irritability                               |                     |              |                    |                  |                  | 5%            |                 |                |                  |
| Lethargy                                   | 8%                  | 9%           |                    | 11%              |                  |               |                 |                |                  |
| Sensory Sensitivity                        |                     |              |                    |                  |                  |               |                 |                | 3%               |
|                                            |                     |              |                    |                  |                  |               |                 |                |                  |
| <b>Overall Adverse Score</b>               | 0                   | 0.3          | 0.1                | 0                | 0.1              | 0.1           | 0               | 0.2            | 0                |
|                                            |                     |              |                    |                  |                  |               |                 |                |                  |
| <b>Symptoms-Adverse</b>                    |                     |              |                    |                  |                  |               |                 |                |                  |

|                                            |  |     |    |  |    |    |  |  |  |
|--------------------------------------------|--|-----|----|--|----|----|--|--|--|
| General worsening, no one specific symptom |  | 1%  | 1% |  | 1% | 1% |  |  |  |
| Aggression/Agitation                       |  |     | 1% |  |    | 2% |  |  |  |
| Gastrointestinal problems                  |  | 17% | 2% |  | 3% | 2% |  |  |  |
| Irritability                               |  |     |    |  | 1% |    |  |  |  |
| Loss of Appetite                           |  | 1%  |    |  |    |    |  |  |  |

**Table S6.** Individual Vitamins/Vitamin-like Nutraceuticals. The table lists the Overall Benefit Score, the most common benefits, the Overall Adverse Score, and the most common adverse effects.

|                                                        | Individual Vitamins/ Vitamin-like Supplements    |                           |                           |                                                          |             |                                           |                                              |                                                |                       |                                                                |                          |                                                      |                           |                           |                    |                           |                          |                      |                           |                                                  |                 |                 |
|--------------------------------------------------------|--------------------------------------------------|---------------------------|---------------------------|----------------------------------------------------------|-------------|-------------------------------------------|----------------------------------------------|------------------------------------------------|-----------------------|----------------------------------------------------------------|--------------------------|------------------------------------------------------|---------------------------|---------------------------|--------------------|---------------------------|--------------------------|----------------------|---------------------------|--------------------------------------------------|-----------------|-----------------|
|                                                        | Treatments (n)                                   |                           |                           |                                                          |             |                                           |                                              |                                                |                       |                                                                |                          |                                                      |                           |                           |                    |                           |                          |                      |                           |                                                  |                 |                 |
|                                                        | Folin<br>ic<br>Acid<br>,<br>high<br>dose<br>(21) | Vita<br>min<br>C<br>(182) | Vita<br>min<br>D<br>(159) | Folin<br>ic<br>Acid<br>,<br>mod<br>erate<br>dose<br>(25) | P5P<br>(25) | Vita<br>min<br>B12<br>(Oral<br>)<br>(152) | Vita<br>min<br>B12<br>(Inje<br>cted)<br>(99) | Coen<br>zym<br>e<br>Q10<br>(Co<br>Q10)<br>(68) | Folic<br>Acid<br>(25) | Vita<br>min<br>A<br>(not<br>as<br>cod<br>liver<br>oil)<br>(34) | Vita<br>min<br>E<br>(42) | Vita<br>min<br>A (as<br>cod<br>liver<br>oil)<br>(31) | Vita<br>min<br>B1<br>(34) | Vita<br>min<br>B3<br>(26) | Bioti<br>n<br>(34) | Vita<br>min<br>B2<br>(29) | Vita<br>min<br>K<br>(29) | Inosi<br>tol<br>(21) | Vita<br>min<br>B5<br>(20) | Vita<br>min<br>B6,<br>medi<br>um<br>dose<br>(40) | DM<br>G<br>(45) | TM<br>G<br>(28) |
| Overall<br>Benefit<br>Score                            | 2.2                                              | 1.9                       | 1.9                       | 1.8                                                      | 1.8         | 1.8                                       | 1.8                                          | 1.6                                            | 1.6                   | 1.6                                                            | 1.6                      | 1.5                                                  | 1.5                       | 1.5                       | 1.4                | 1.4                       | 1.4                      | 1.3                  | 1.3                       | 1.3                                              | 1.2             | 1               |
|                                                        |                                                  |                           |                           |                                                          |             |                                           |                                              |                                                |                       |                                                                |                          |                                                      |                           |                           |                    |                           |                          |                      |                           |                                                  |                 |                 |
| Symptoms-<br>Benefit                                   |                                                  |                           |                           |                                                          |             |                                           |                                              |                                                |                       |                                                                |                          |                                                      |                           |                           |                    |                           |                          |                      |                           |                                                  |                 |                 |
| General<br>Benefit, no<br>one<br>particular<br>symptom | 52%                                              | 57%                       | 52%                       | 56%                                                      | 40%         | 40%                                       | 32%                                          | 63%                                            | 60%                   | 59%                                                            | 60%                      | 56%                                                  | 62%                       | 62%                       | 44%                | 59%                       | 48%                      | 14%                  | 52%                       | 43%                                              | 31%             | 18%             |

|                                                       |     |     |     |     |     |     |     |     |    |    |     |     |    |    |    |    |     |     |     |     |     |     |
|-------------------------------------------------------|-----|-----|-----|-----|-----|-----|-----|-----|----|----|-----|-----|----|----|----|----|-----|-----|-----|-----|-----|-----|
| Aggression/<br>Agitation                              |     |     |     |     |     |     |     |     |    |    |     |     |    |    |    |    |     |     |     |     |     |     |
| Anxiety                                               |     |     |     |     | 20% |     |     |     | 8% |    |     |     |    | 8% |    |    |     | 14% |     |     |     |     |
| Attention                                             | 29% |     |     |     | 16% |     | 20% |     |    |    | 10% | 6%  | 3% | 8% |    | 7% | 3%  |     |     | 13% |     |     |
| Cognition                                             | 33% |     |     |     |     | 25% | 28% | 16% |    |    |     |     |    |    |    | 7% |     |     |     | 8%  | 9%  |     |
| Constipation                                          |     | 12% |     |     |     |     |     |     |    |    |     |     |    |    |    |    |     |     |     |     |     |     |
| Depression                                            |     |     | 6%  |     |     |     |     |     |    |    |     |     |    |    |    |    |     |     |     |     |     |     |
| Eczema/Skin Problems                                  |     |     |     |     |     |     |     |     |    |    |     |     |    |    | 9% |    |     |     |     |     |     |     |
| General health                                        |     |     |     |     |     |     |     |     |    |    |     |     |    |    |    |    |     |     | 10% |     |     |     |
| Health                                                |     | 27% | 18% |     |     |     |     |     |    | 6% | 14% | 10% | 6% |    |    |    | 10% |     |     |     |     |     |
| Hyperactivity                                         |     |     |     |     |     |     |     |     | 4% |    |     |     |    |    | 6% |    |     |     |     |     |     |     |
| Irritability                                          |     |     |     |     |     |     |     |     |    |    |     |     |    |    |    |    |     | 10% |     |     |     |     |
| Language/Communication                                | 24% |     |     | 20% |     | 18% | 30% |     |    |    |     |     |    |    |    |    |     |     |     |     | 11% | 29% |
| Lethargy                                              |     |     |     |     |     |     |     | 9%  |    |    |     |     |    |    |    |    |     |     |     |     |     |     |
| Social Interaction                                    |     |     |     | 16% |     |     |     |     |    |    |     |     |    |    |    |    |     |     |     |     |     | 11% |
| Stimming/P<br>erseveration<br>/Desire for<br>Sameness |     |     |     |     |     |     |     |     |    | 9% |     |     |    |    |    |    |     |     |     |     |     |     |

|                                                        |     |     |   |     |     |     |     |   |     |     |   |     |      |     |    |      |   |     |   |     |     |     |
|--------------------------------------------------------|-----|-----|---|-----|-----|-----|-----|---|-----|-----|---|-----|------|-----|----|------|---|-----|---|-----|-----|-----|
|                                                        |     |     |   |     |     |     |     |   |     |     |   |     |      |     |    |      |   |     |   |     |     |     |
| <b>Overall<br/>Adverse<br/>Score</b>                   | 0.3 | 0.1 | 0 | 0.2 | 0.2 | 0.2 | 0.3 | 0 | 0.1 | 0.1 | 0 | 0.1 | 0.09 | 0.2 | 0  | 0.07 | 0 | 0.2 | 0 | 0.1 | 0.2 | 0.3 |
|                                                        |     |     |   |     |     |     |     |   |     |     |   |     |      |     |    |      |   |     |   |     |     |     |
| <b>Symptoms-<br/>Adverse</b>                           |     |     |   |     |     |     |     |   |     |     |   |     |      |     |    |      |   |     |   |     |     |     |
| General<br>worsening,<br>no one<br>specific<br>symptom |     |     |   | 4%  | 4%  |     |     |   |     |     |   |     | 3%   |     |    |      |   |     |   |     |     |     |
| Aggression/<br>Agitation                               |     | 1%  |   | 4%  | 4%  | 3%  | 4%  |   |     | 3%  |   |     |      |     | 3% |      |   | 5%  |   | 3%  | 2%  |     |
| Anxiety                                                | 10% |     |   | 4%  |     | 3%  |     |   |     |     |   |     |      |     |    |      |   | 5%  |   |     |     | 4%  |
| Behavior<br>Problems                                   |     |     |   |     |     |     |     |   |     | 3%  |   |     |      |     |    |      |   | 5%  |   |     |     |     |
| Decreased<br>Cognition                                 |     |     |   |     |     |     |     |   |     |     |   | 3%  |      |     |    |      |   |     |   |     |     |     |
| Dry Mouth                                              |     |     |   |     |     |     |     |   |     |     |   |     |      |     | 9% |      |   |     |   |     |     |     |
| Gastrointest<br>inal<br>Problems                       |     | 2%  |   |     |     |     |     |   |     |     |   |     |      |     | 6% | 3%   |   |     |   |     |     |     |
| Headache/<br>Migraine                                  |     |     |   |     |     |     |     |   |     |     |   |     |      |     |    |      |   |     |   | 3%  |     |     |

|                                                       |     |    |    |  |    |    |    |  |    |    |  |    |    |    |  |    |  |  |  |  |    |     |
|-------------------------------------------------------|-----|----|----|--|----|----|----|--|----|----|--|----|----|----|--|----|--|--|--|--|----|-----|
| Hyperactivity                                         | 10% |    | 1% |  | 8% | 3% | 7% |  | 8% |    |  |    | 3% | 4% |  | 3% |  |  |  |  | 7% | 11% |
| Irritability                                          | 10% |    |    |  |    |    | 7% |  |    | 3% |  | 3% |    |    |  |    |  |  |  |  | 7% | 7%  |
| Liver/Kidney Problem                                  |     | 2% |    |  |    |    |    |  |    |    |  |    |    |    |  |    |  |  |  |  |    |     |
| Stimming/P<br>erseveration<br>/Desire for<br>Sameness |     |    | 1% |  |    |    |    |  |    |    |  |    |    |    |  |    |  |  |  |  |    |     |

**Table S7.** Multivitamins. The table lists the Overall Benefit Score, the most common benefits, the Overall Adverse Score, and the most common adverse effects.

|                                            | <b>Multivitamins</b>                   |                                                                              |                                                   |
|--------------------------------------------|----------------------------------------|------------------------------------------------------------------------------|---------------------------------------------------|
|                                            | <b>Treatments (n)</b>                  |                                                                              |                                                   |
|                                            | <b>High Dose<br/>Multivitamin (46)</b> | <b>High Dose<br/>Multivitamin for<br/>Children/Adults with<br/>ASD (103)</b> | <b>Generic Child/Adult<br/>Multivitamin (436)</b> |
| <b>Overall Benefit Score</b>               | 1.9                                    | 1.8                                                                          | 1.4                                               |
| <b>Symptoms-Benefit</b>                    |                                        |                                                                              |                                                   |
| General benefit, no one particular symptom | 52%                                    | 50%                                                                          | 55%                                               |
| Attention                                  |                                        | 19%                                                                          |                                                   |
| Cognition                                  | 13%                                    | 21%                                                                          | 2%                                                |
| Health                                     | 26%                                    |                                                                              | 10%                                               |
| <b>Overall Adverse Score</b>               | 0.2                                    | 0.2                                                                          | 0                                                 |
| <b>Symptoms-Adverse</b>                    |                                        |                                                                              |                                                   |
| General worsening, no one specific symptom | 2%                                     | 2%                                                                           | 0.2%                                              |
| Aggression/Agitation                       |                                        |                                                                              | 0.5%                                              |
| Gastrointestinal Problems                  | 2%                                     | 2%                                                                           |                                                   |
| Hyperactivity                              |                                        | 3%                                                                           | 0.5%                                              |
| Irritability                               | 2%                                     |                                                                              |                                                   |



**Table S8.** Sleep Treatments. The table lists the Overall Benefit Score, the most common benefits, the Overall Adverse Score, and the most common adverse effects.

|                                            | Sleep Treatments |            |                    |
|--------------------------------------------|------------------|------------|--------------------|
|                                            | Treatments (n)   |            |                    |
|                                            | Melatonin (367)  | 5-HTP (45) | Valerian Root (38) |
| <b>Overall Benefit Score</b>               | 2.1              | 1.8        | 1.2                |
|                                            |                  |            |                    |
| <b>Symptoms-Benefit</b>                    |                  |            |                    |
| General benefit, no one particular symptom | 6%               | 27%        |                    |
| Falling asleep                             | 74%              | 36%        | 53%                |
| Irritability                               |                  |            | 11%                |
| Staying asleep                             | 35%              | 27%        | 29%                |
|                                            |                  |            |                    |
| <b>Overall Adverse Score</b>               | 0.3              | 0.1        | 0                  |
|                                            |                  |            |                    |
| <b>Symptoms-Adverse</b>                    |                  |            |                    |
| Aggression/Agitation                       | 2%               | 4%         | 5%                 |
| Anxiety                                    |                  | 2%         |                    |
| Behavior Problems                          | 2%               |            | 5%                 |
| Fatigue/Drowsiness                         |                  |            | 5%                 |
| Headache/Migraine                          |                  | 2%         |                    |
| Sleep Problems                             | 7%               |            |                    |



**Table S9.** Other Miscellaneous Nutraceuticals. The table lists the Overall Benefit Score, the most common benefits, the Overall Adverse Score, and the most common adverse effects.

|                                            | <b>Other Nutraceuticals</b>                    |                         |                          |                       |                  |
|--------------------------------------------|------------------------------------------------|-------------------------|--------------------------|-----------------------|------------------|
|                                            | <b>Treatments (n)</b>                          |                         |                          |                       |                  |
|                                            | <b>Fruit/Vegetable Powder Concentrate (21)</b> | <b>Epsom Salt (141)</b> | <b>Milk Thistle (28)</b> | <b>Carnitine (54)</b> | <b>GABA (69)</b> |
| <b>Overall Benefit Score</b>               | 2.2                                            | 1.6                     | 1.5                      | 1.3                   | 1.3              |
|                                            |                                                |                         |                          |                       |                  |
| <b>Symptoms-Benefit</b>                    |                                                |                         |                          |                       |                  |
| General Benefit, no one particular symptom | 67%                                            | 22%                     | 46%                      | 43%                   | 25%              |
| Aggression/Agitation                       |                                                | 35%                     | 4%                       |                       |                  |
| Anxiety                                    |                                                |                         |                          |                       | 26%              |
| Attention                                  |                                                | 26%                     |                          |                       |                  |
| Cognition                                  |                                                |                         |                          | 9%                    |                  |
| Constipation                               | 24%                                            |                         |                          |                       |                  |
| Falling Asleep                             |                                                |                         |                          |                       | 17%              |
| Health                                     | 24%                                            |                         |                          |                       |                  |
| Irritability                               |                                                |                         | 7%                       |                       |                  |
| Lethargy                                   |                                                |                         |                          | 19%                   |                  |
|                                            |                                                |                         |                          |                       |                  |
| <b>Overall Adverse Score</b>               | 0                                              | 0                       | 0                        | 0.1                   | 0.2              |
|                                            |                                                |                         |                          |                       |                  |
| <b>Symptoms-Adverse</b>                    |                                                |                         |                          |                       |                  |

|                                            |  |    |    |    |    |
|--------------------------------------------|--|----|----|----|----|
| General worsening, no one specific symptom |  | 1% |    |    |    |
| Aggression/Agitation                       |  |    | 4% | 6% | 6% |
| Anxiety                                    |  | 1% | 4% |    | 4% |
| Behavioral Problems                        |  |    |    |    | 4% |
| Hyperactivity                              |  |    | 4% |    |    |
| Irritability                               |  |    |    | 6% |    |
| Rash                                       |  | 1% |    |    |    |
